# Supplementary material
Source: PubMed Central journal article supplement (PMC124915)

### Angiotensinase

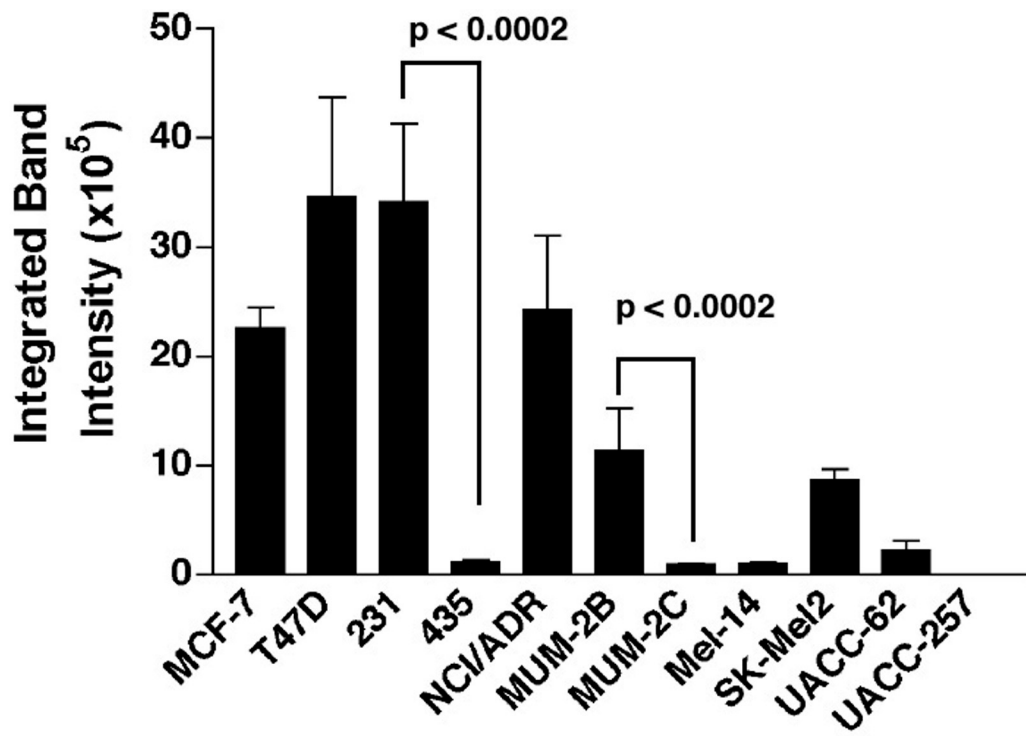

### Acyl-Peptide Hydrolase (APH)

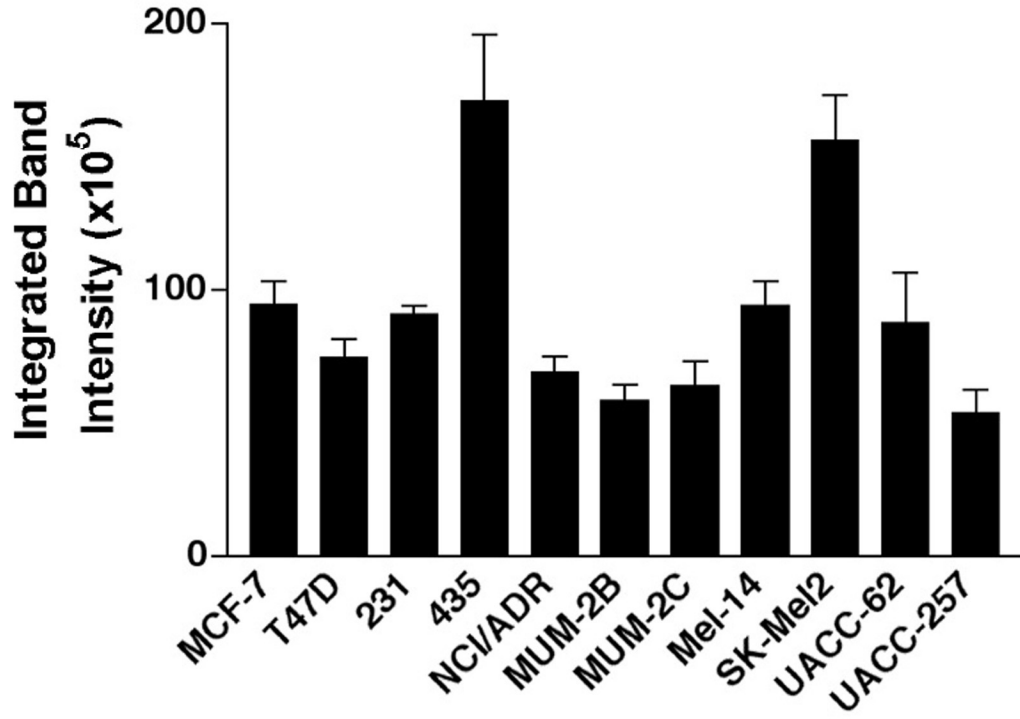

### Butyrylcholinesterase (BCHE)

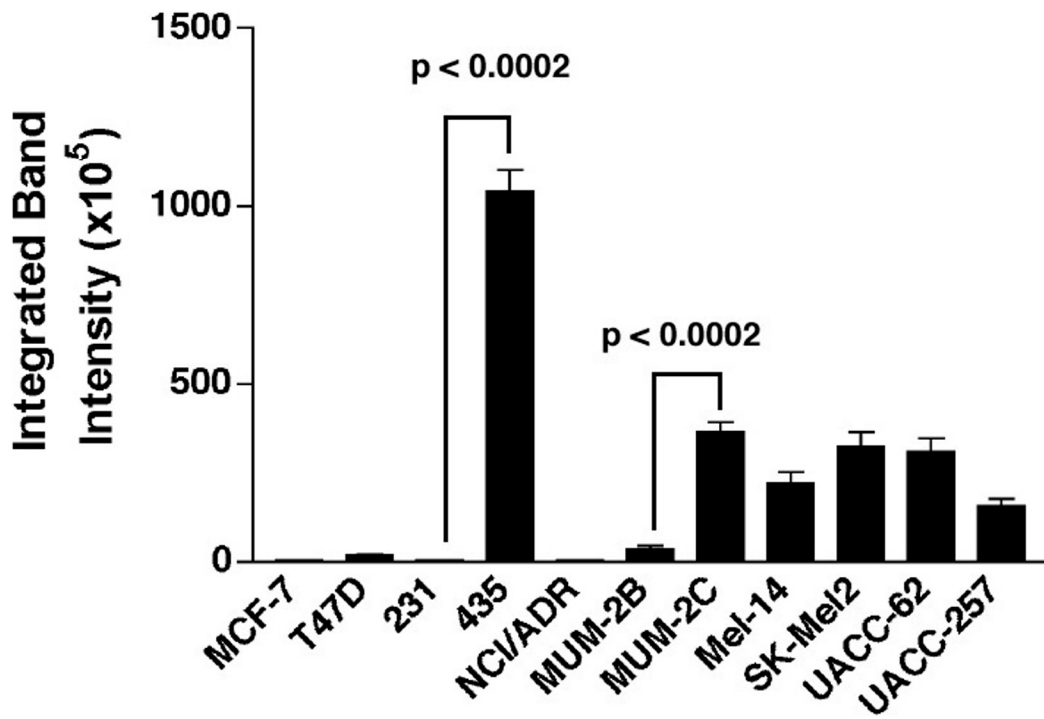

### Cathepsin A

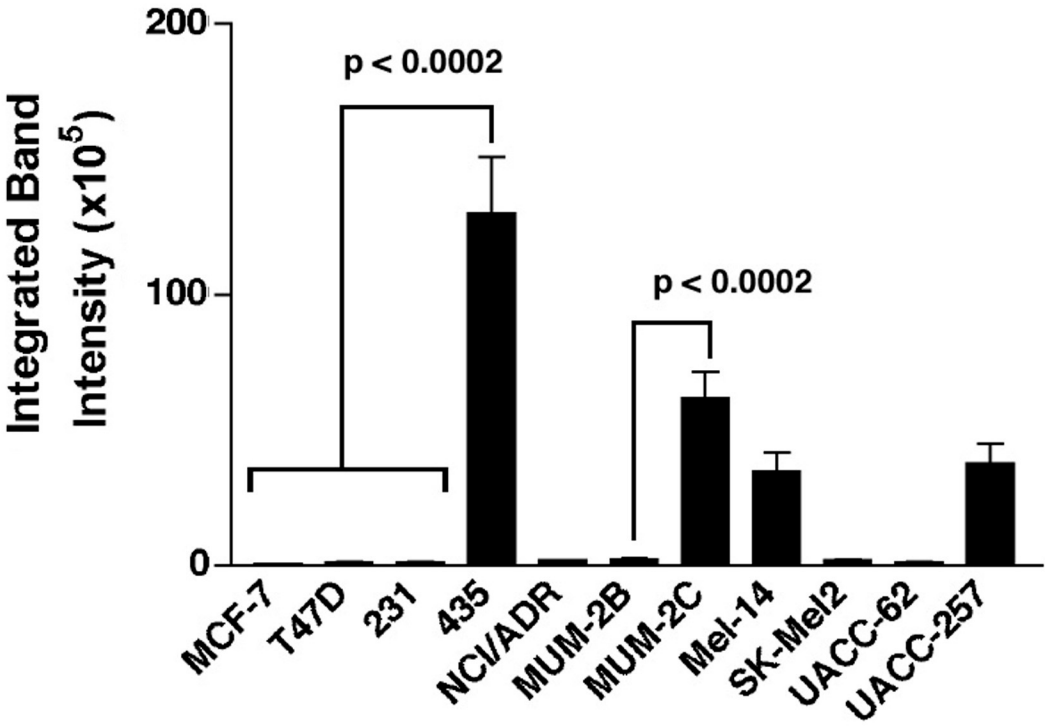

### Complement 1s

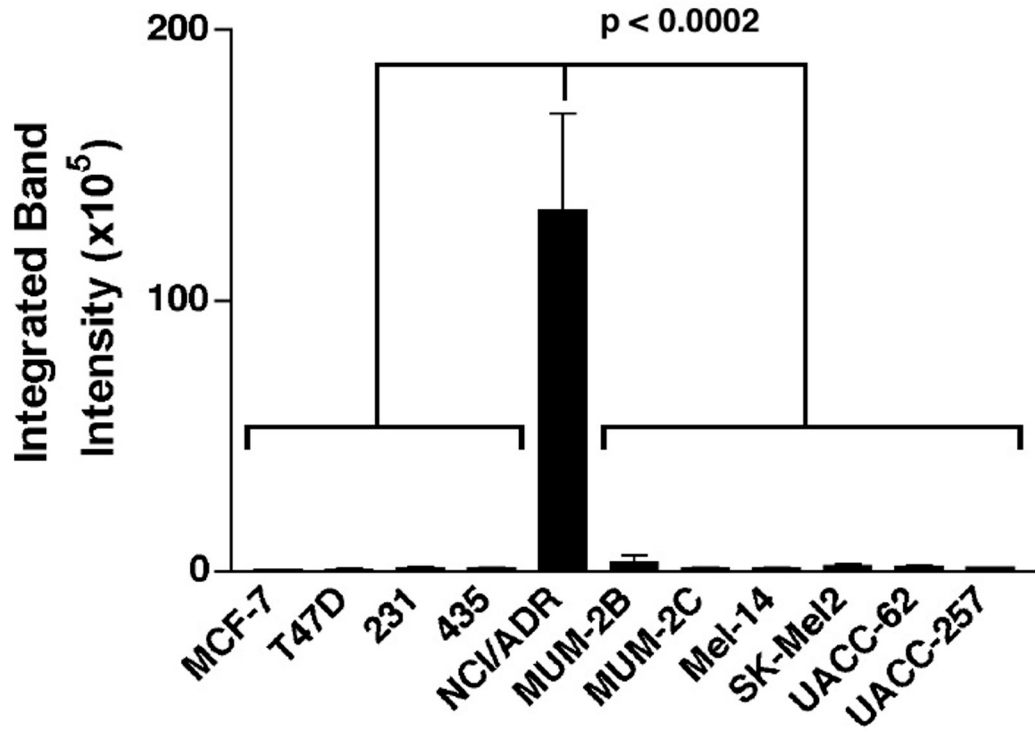

### Dipeptidyl Peptidase VIII (DPP8)

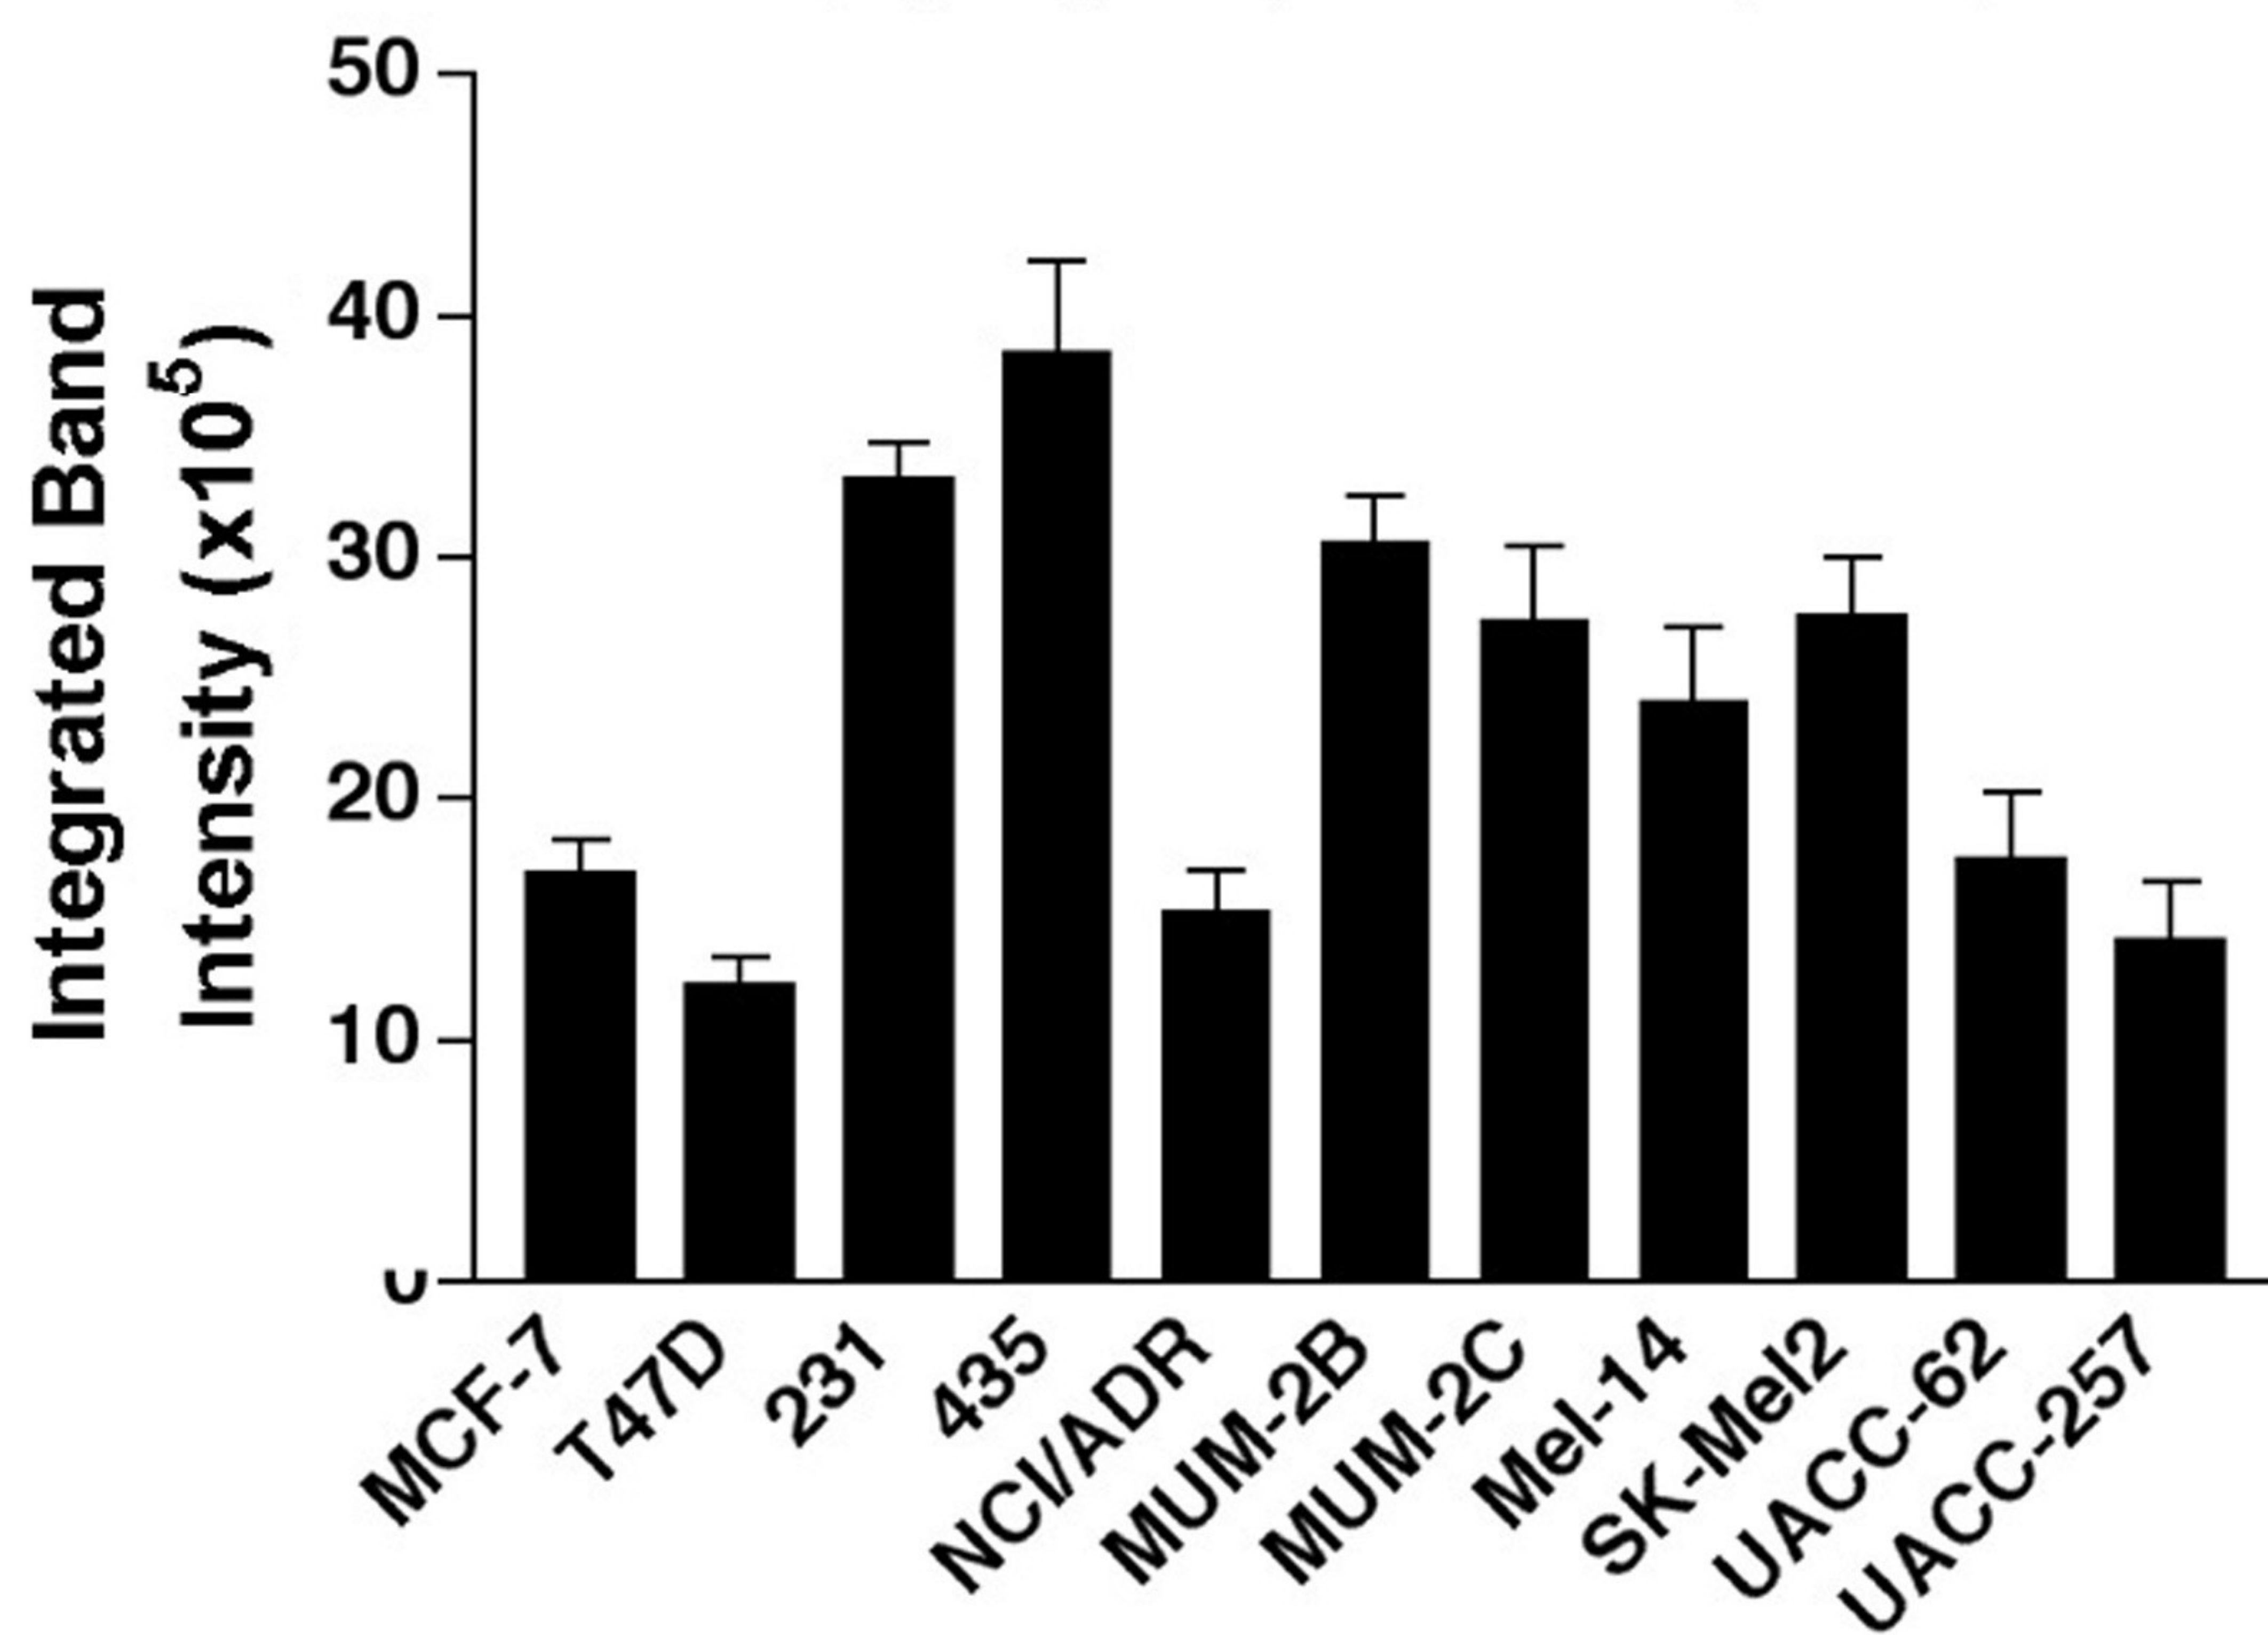

### Esterase D

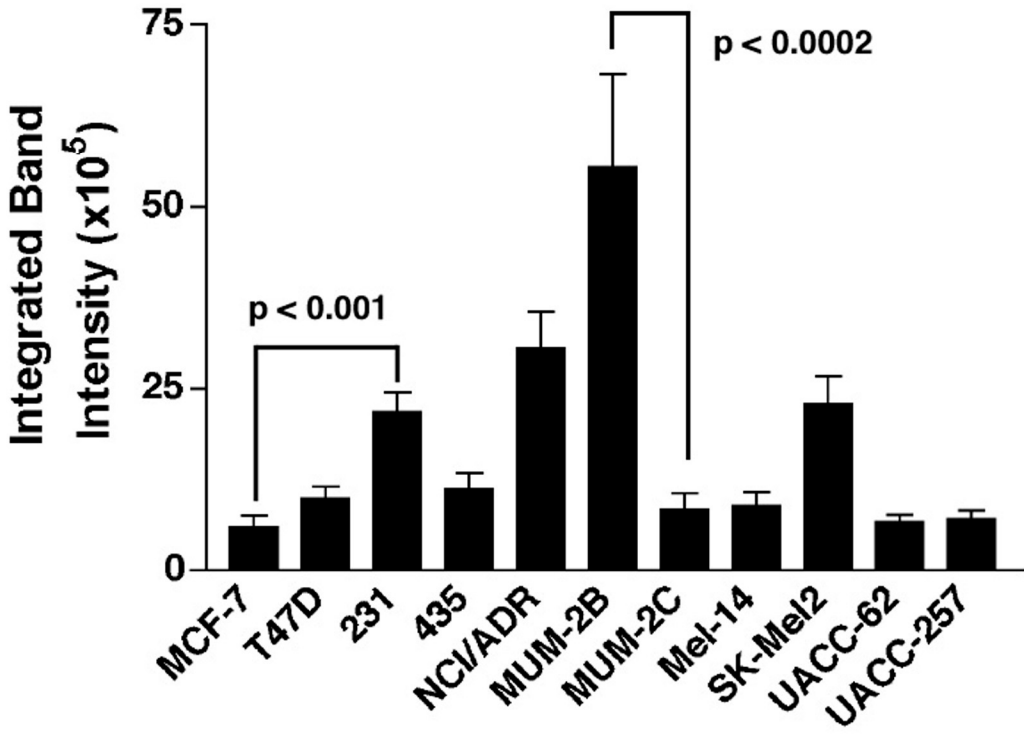



### Fatty Acid Synthase (FAS)

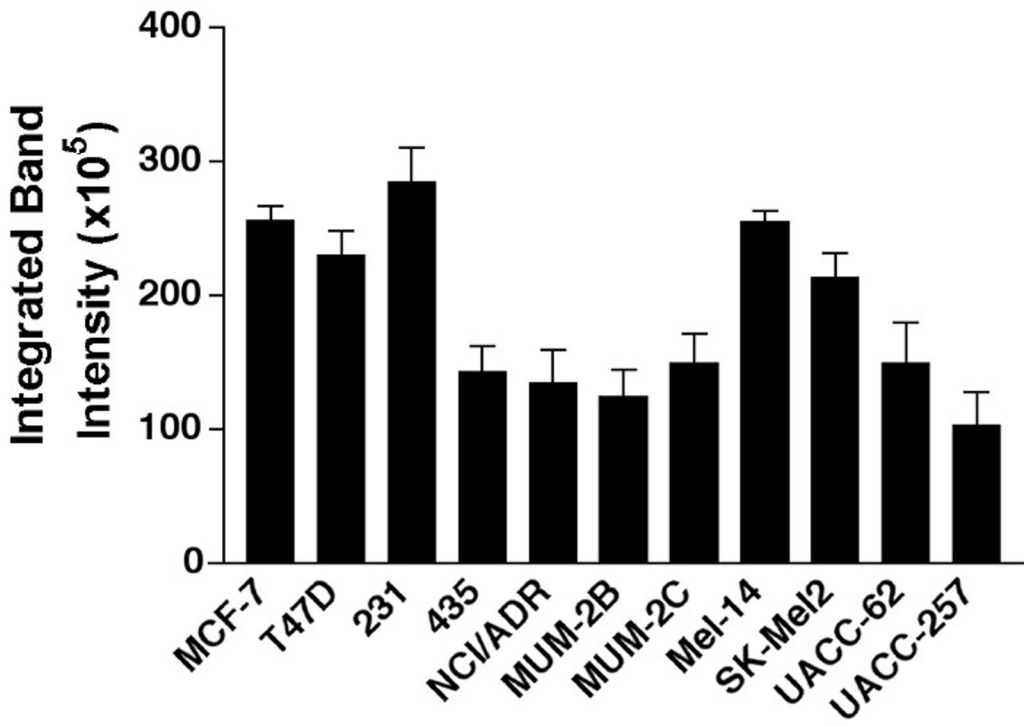

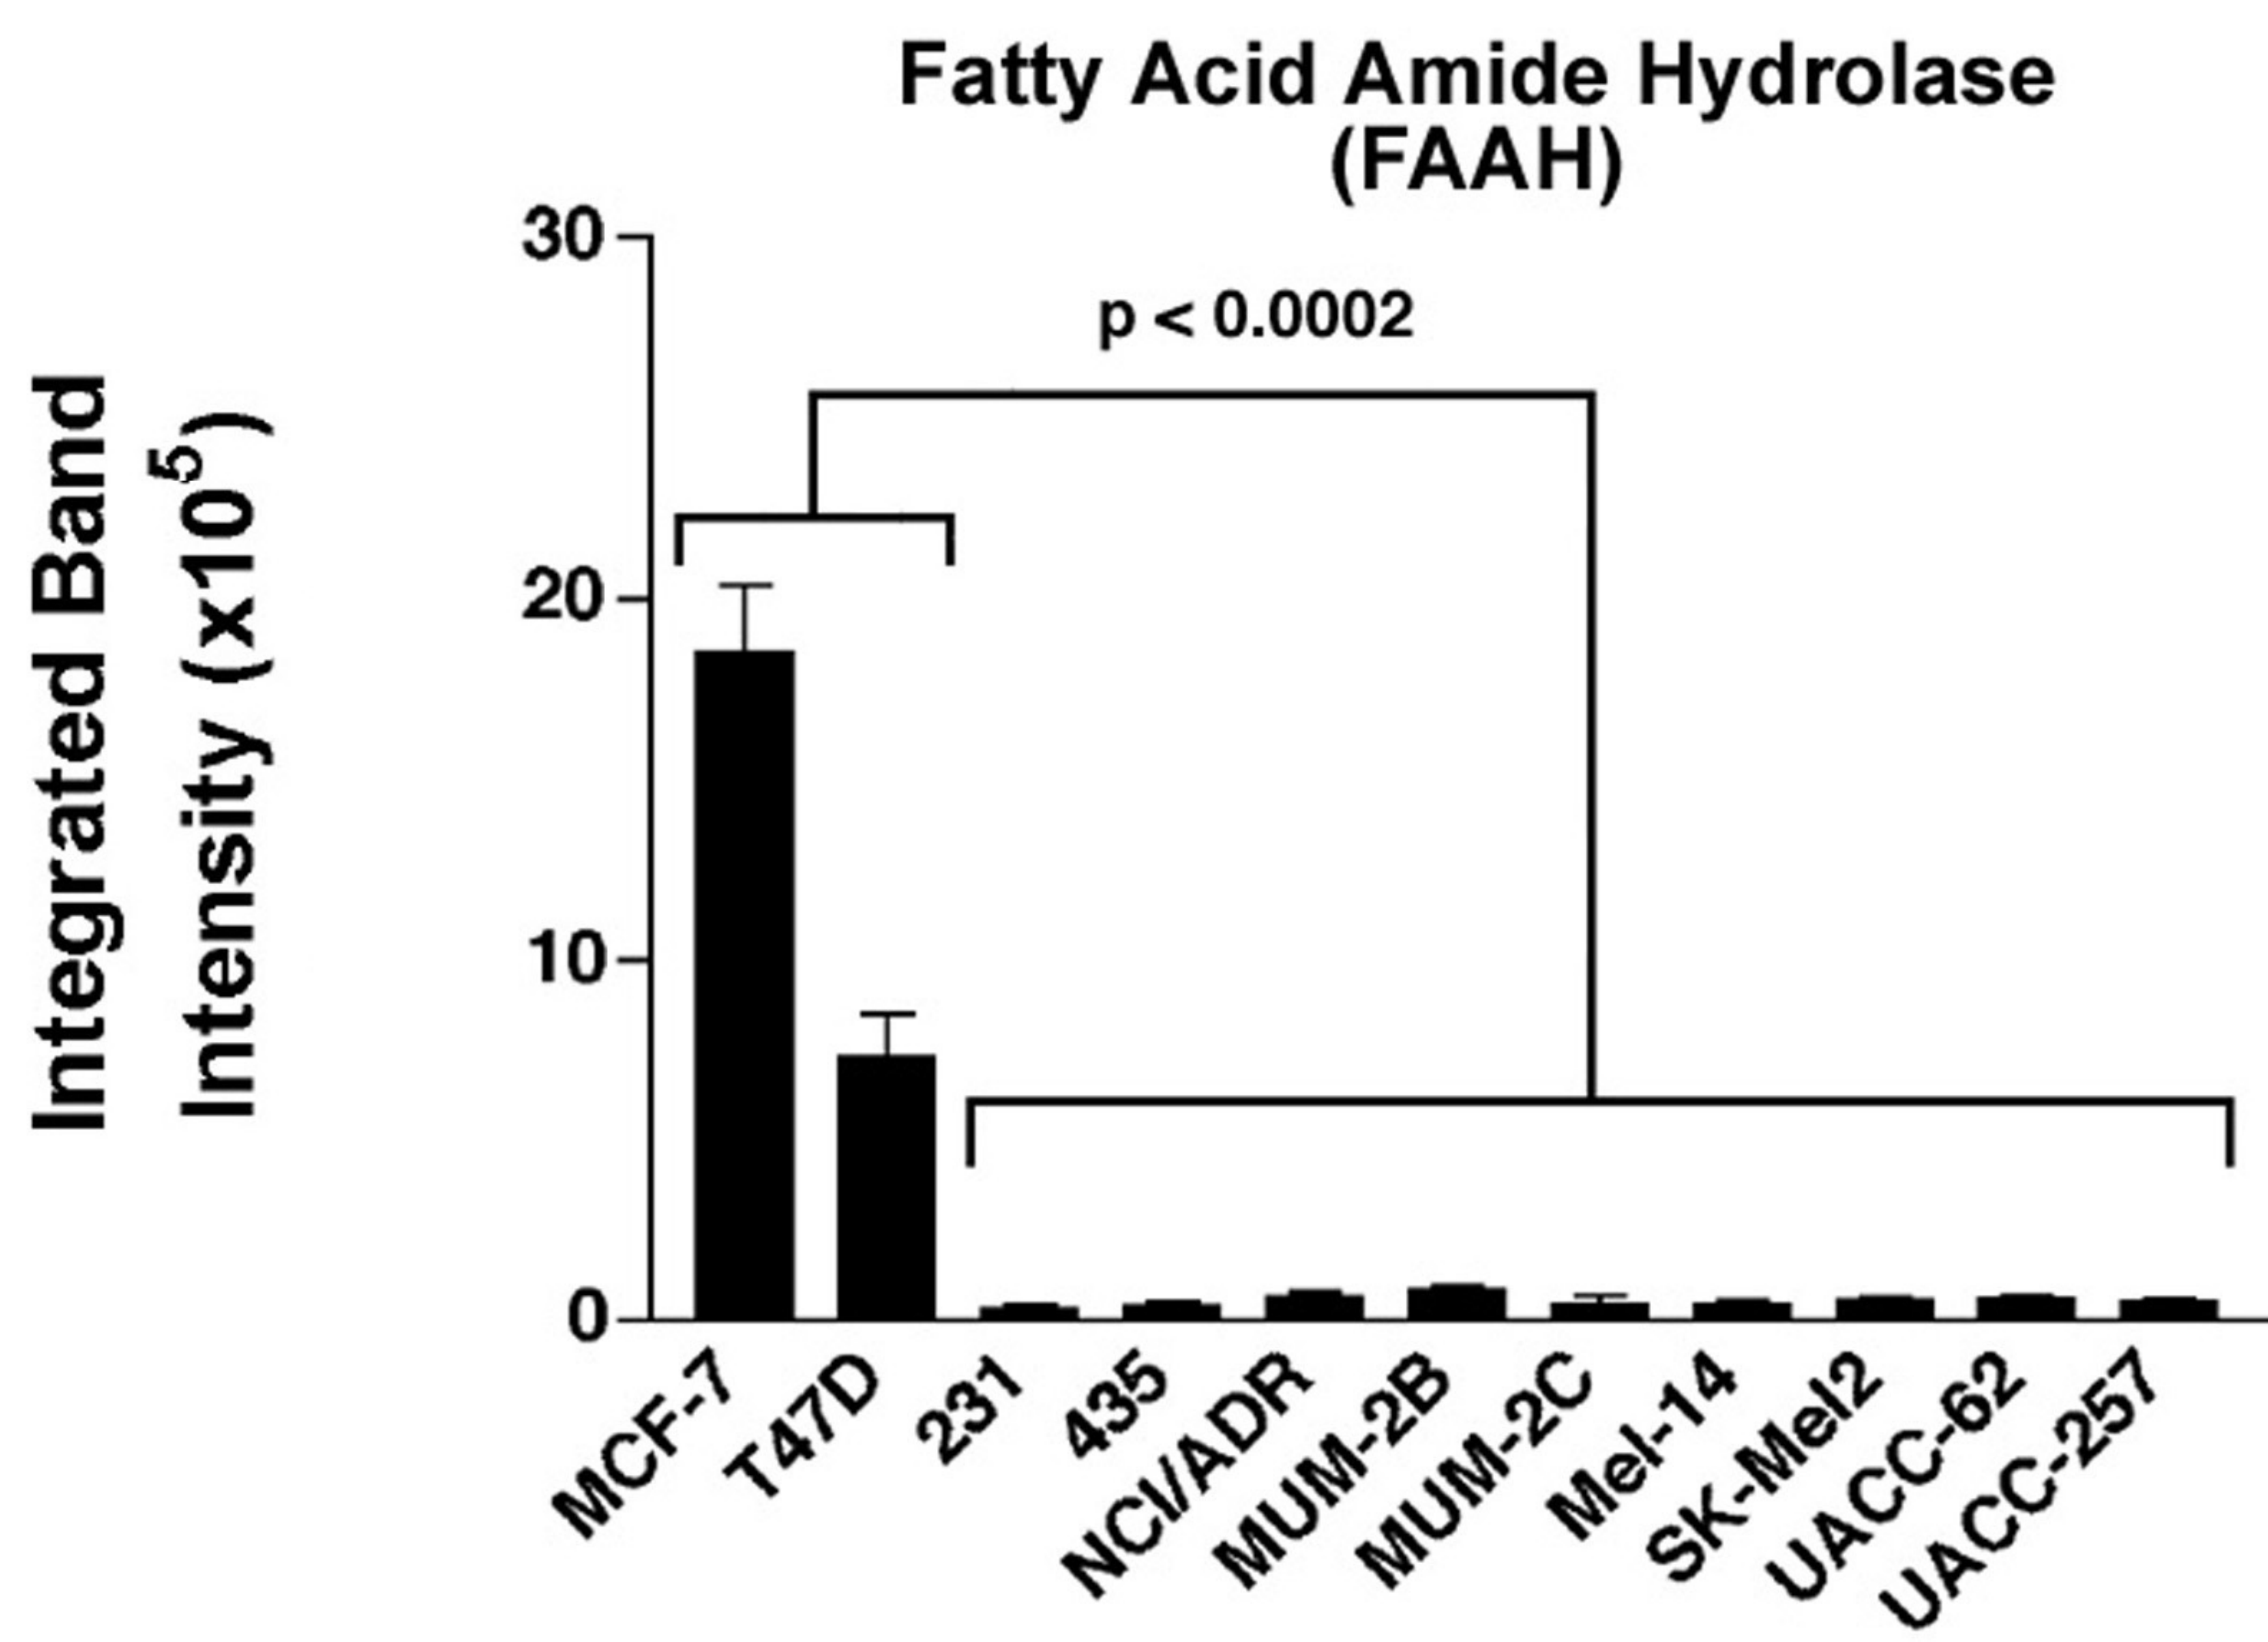

### KIAA1363 Membrane Hydrolase (Deglycosylated)

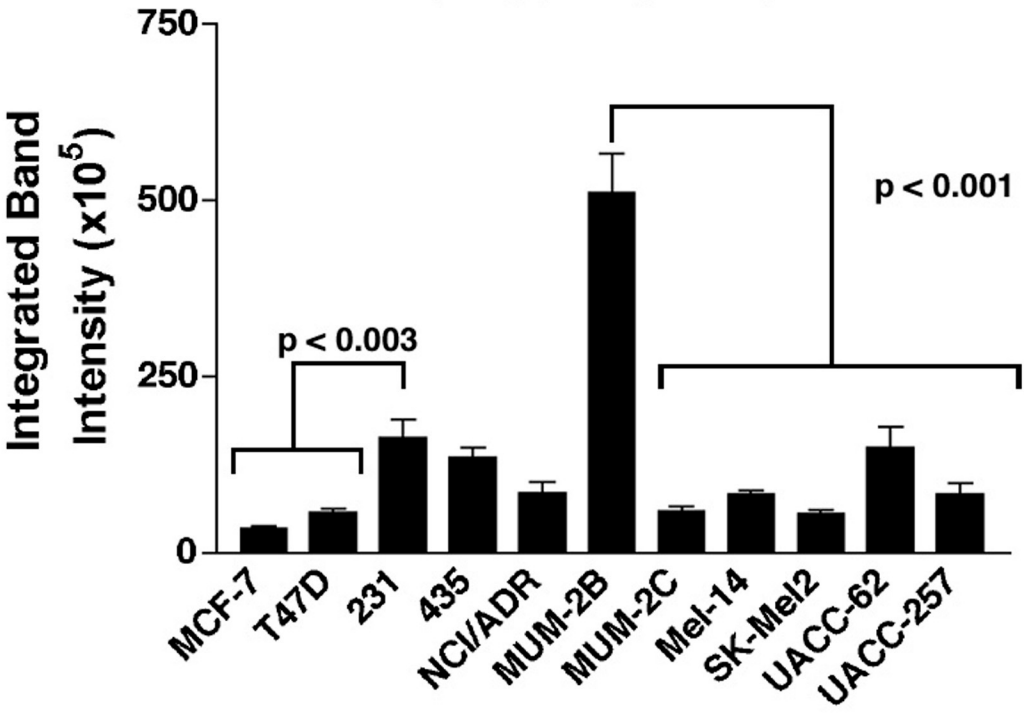

Soluble Alpha/Beta Hydrolase  
(FLJ11342)

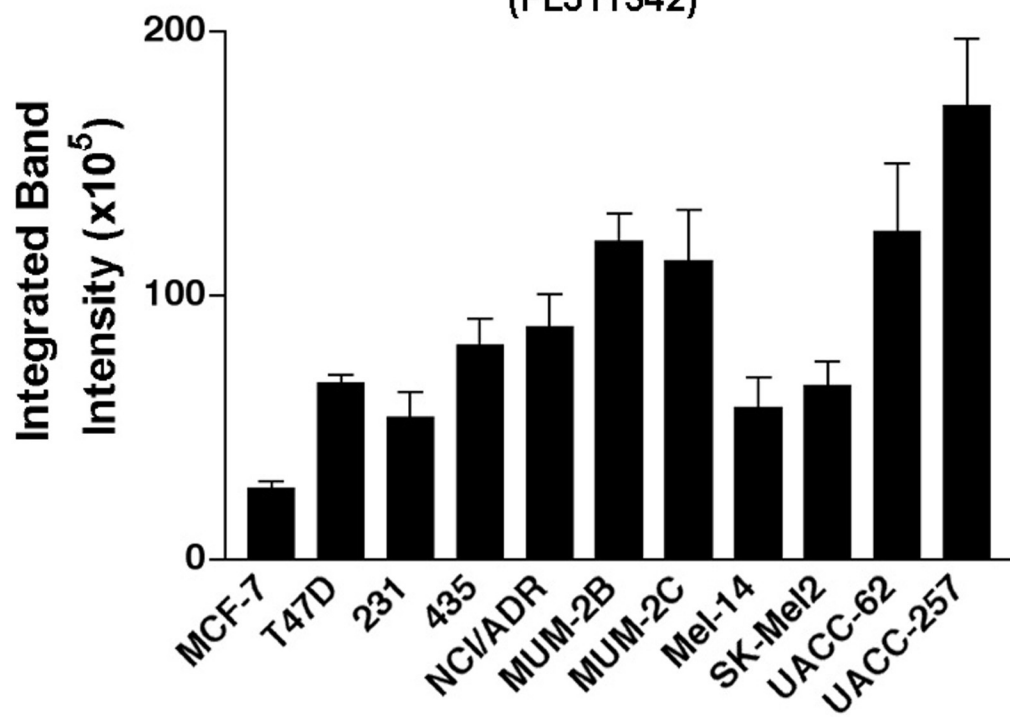

### KIAA1363 Membrane Hydrolase (Deglycosylated)



### KIAA1363 Membrane Hydrolase (Lower Glycosylated Form)

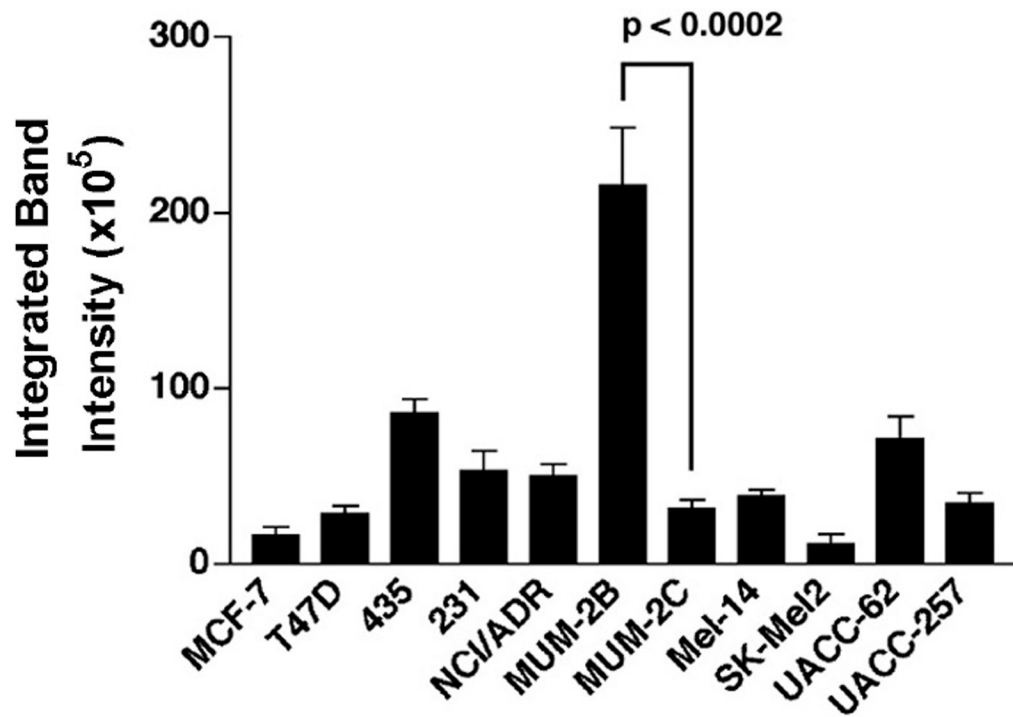

### KIAA1363 Membrane Hydrolase (Upper Glycosylated Form)

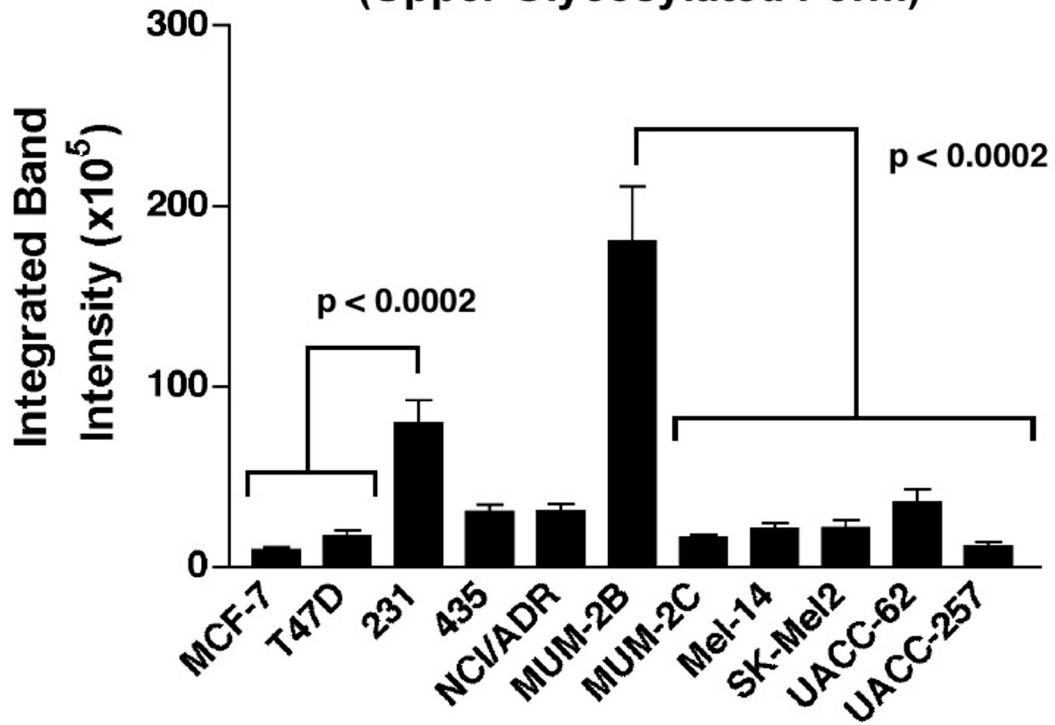

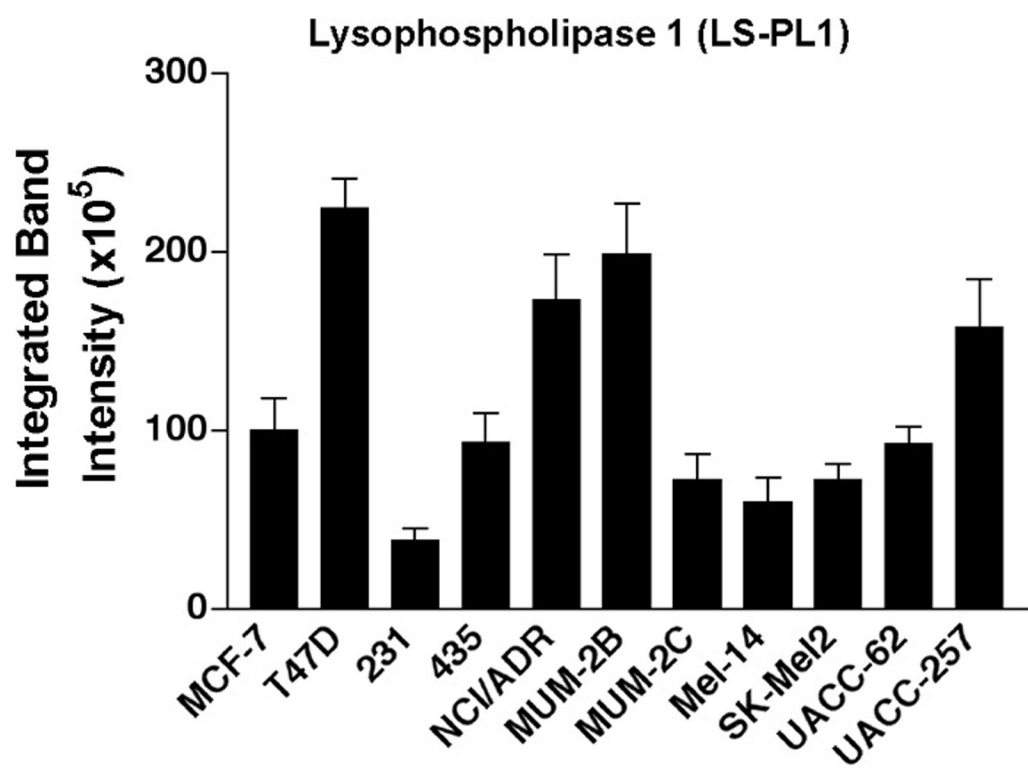



### Lysophospholipase 2 (LS-PL2)

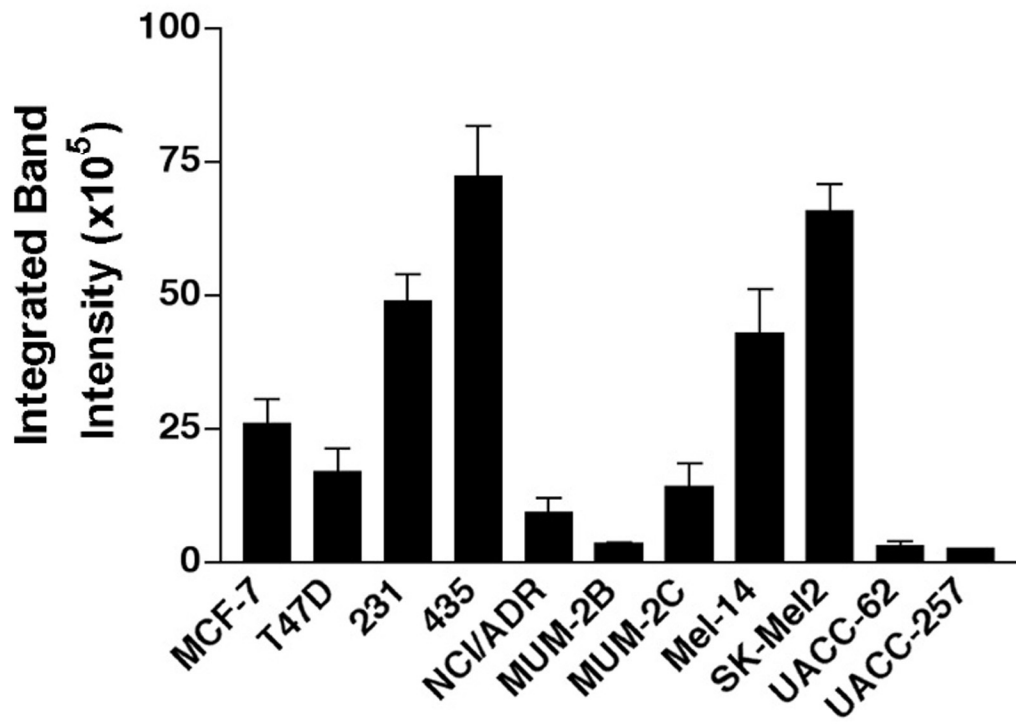

PAF Acetylhydrolase  
Isoform 1b, beta subunit  
(PAF-AH 1b-beta)

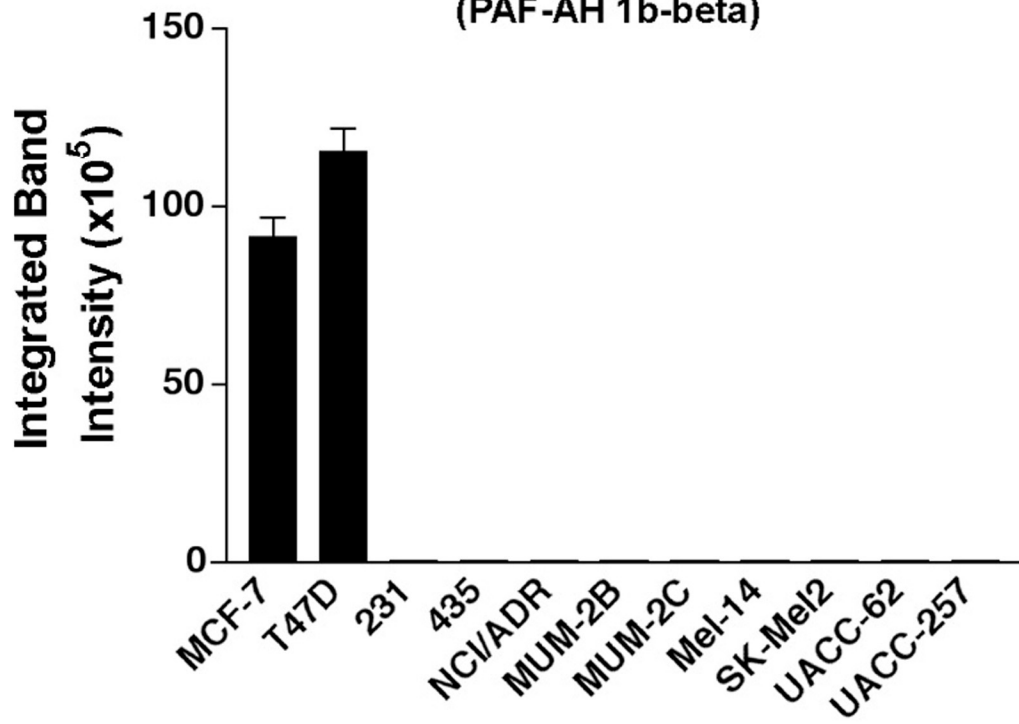

### Platelet-Activating Factor Acetylhydrolase 2 (PAF-AH 2)

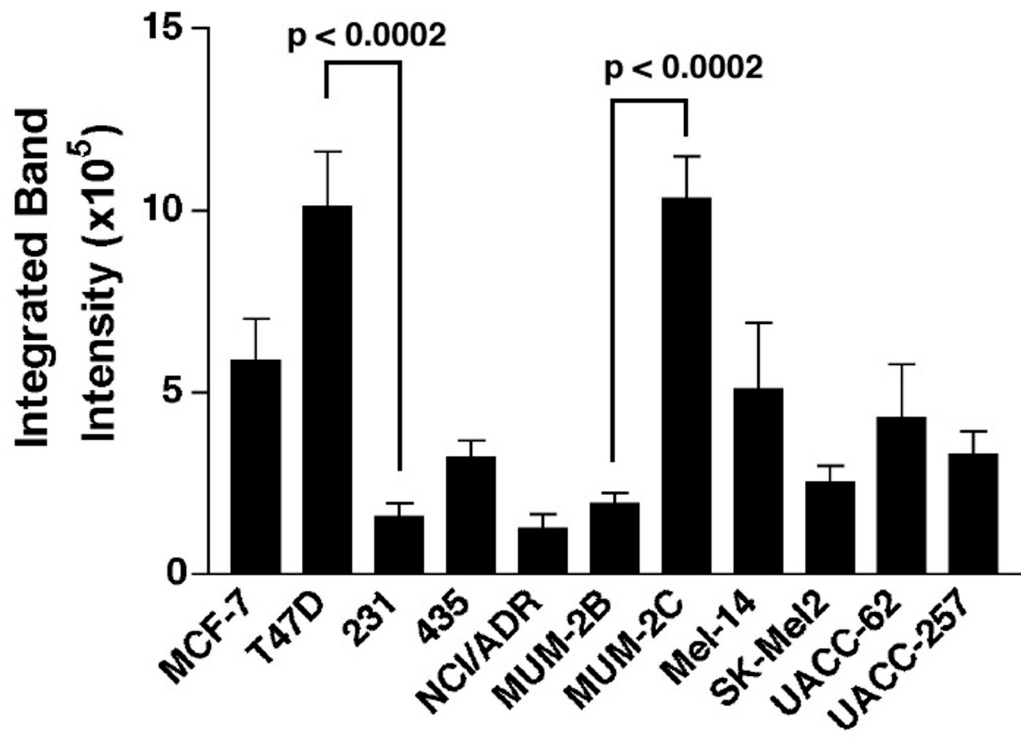

Soluble Alpha/Beta Hydrolase  
(PP1226)

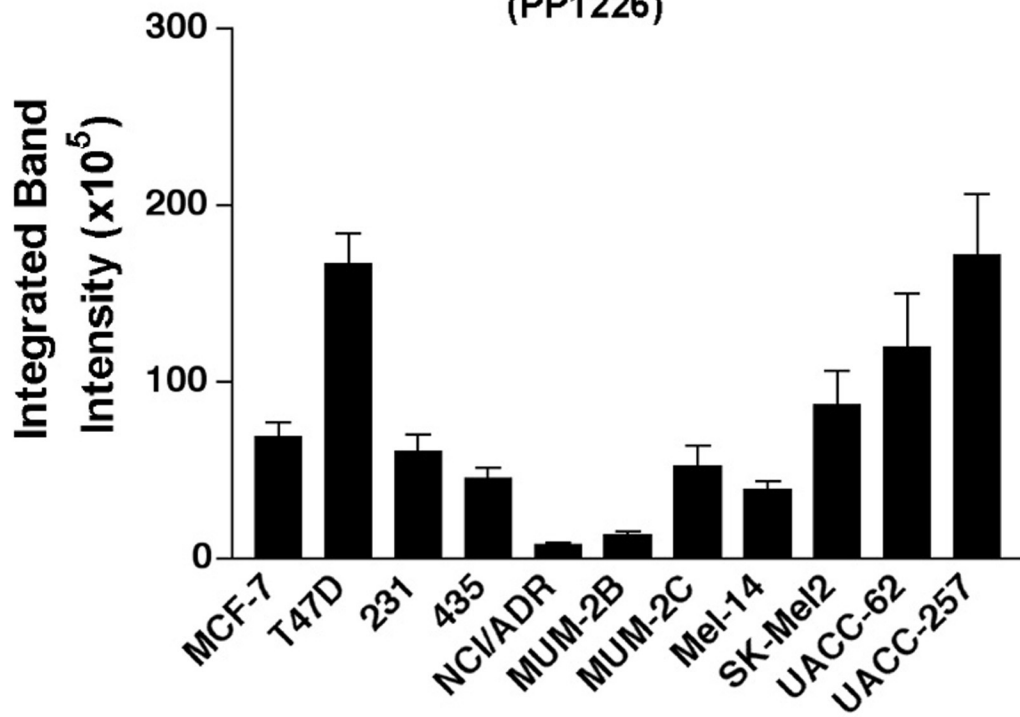

### Palmitoyl-Protein Thioesterase 2 (PPT-2)

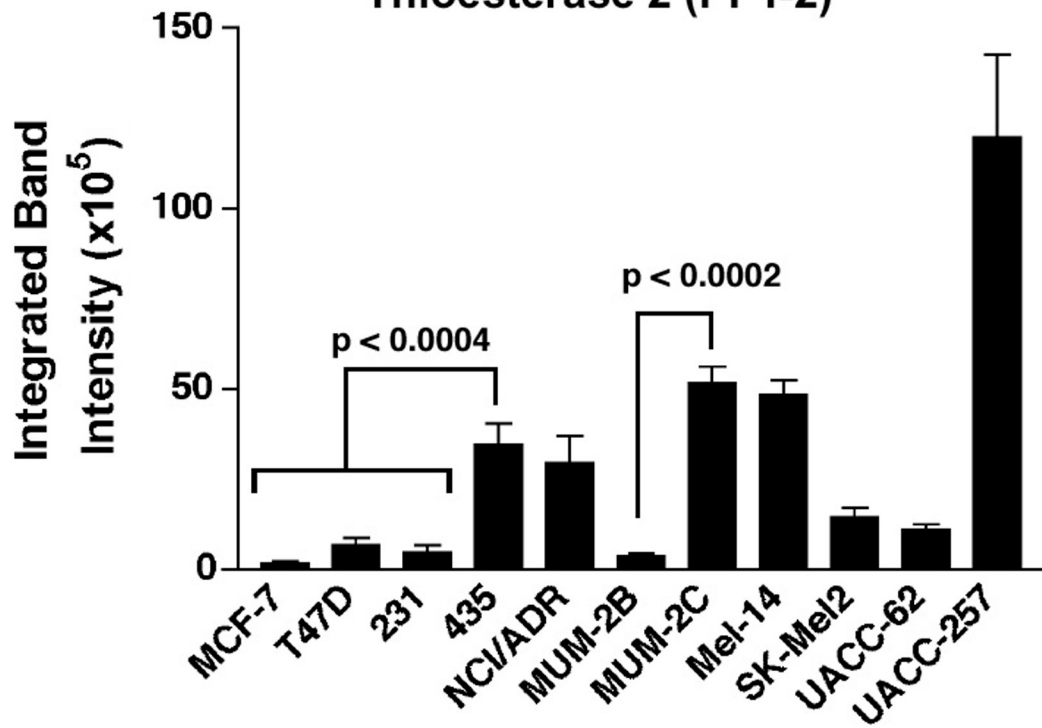

Peroxisomal Long-Chain  
Acyl CoA Thioesterase (PTE)

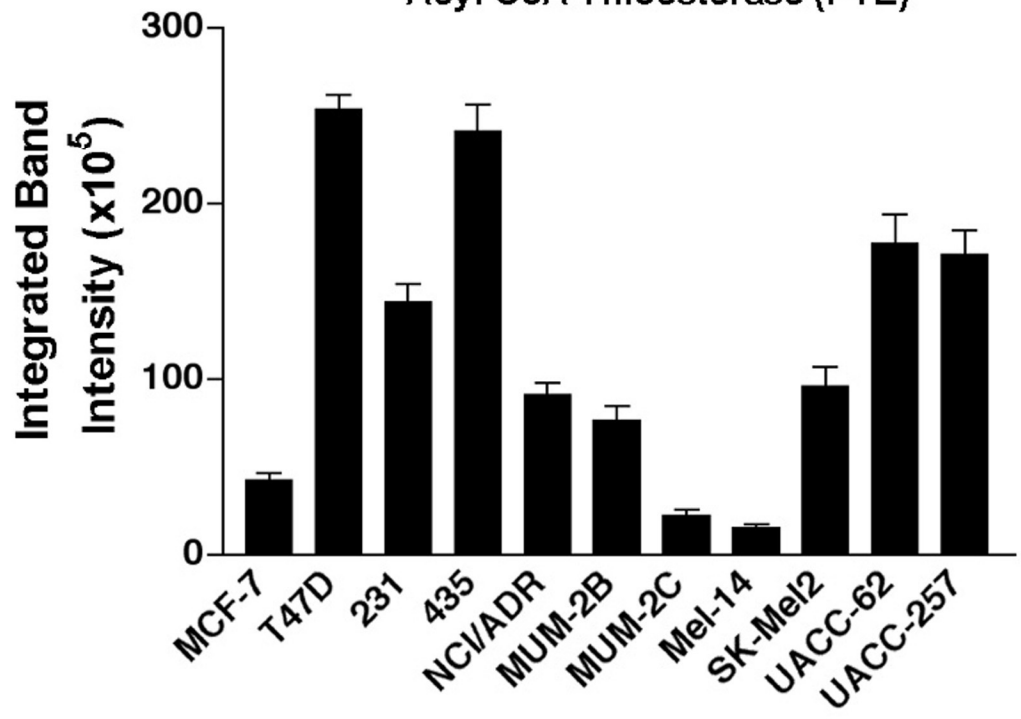

### Phosphatidylserine-Specific Phospholipase-1 (PS-PL1)

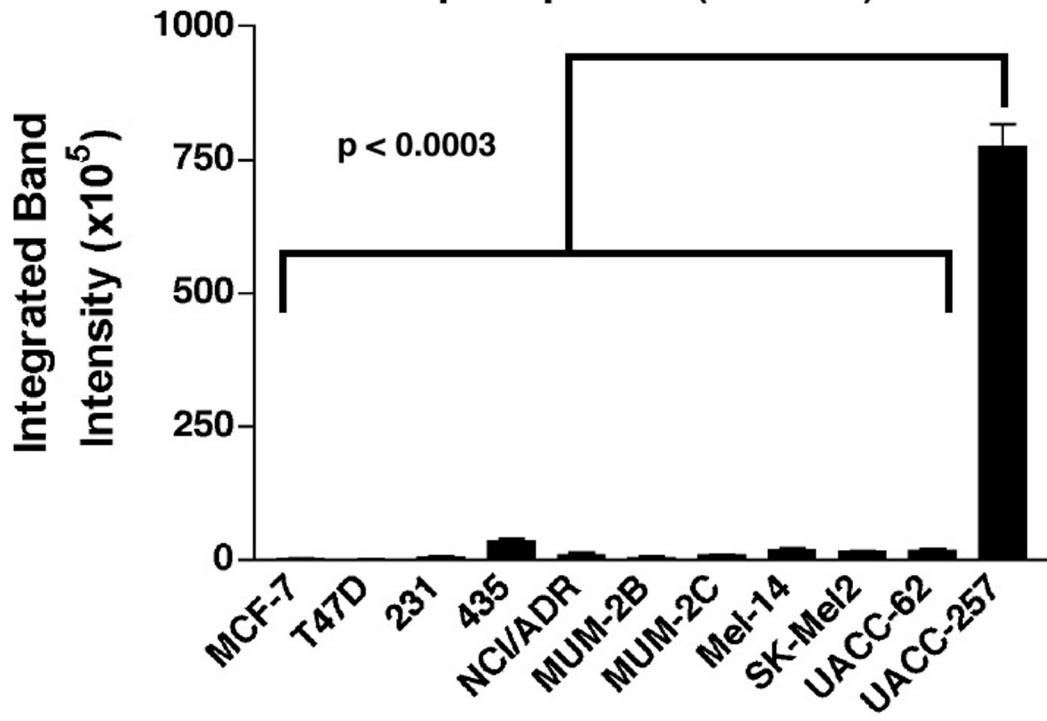

### Sialic Acid O-Acetyltransferase (SAE)

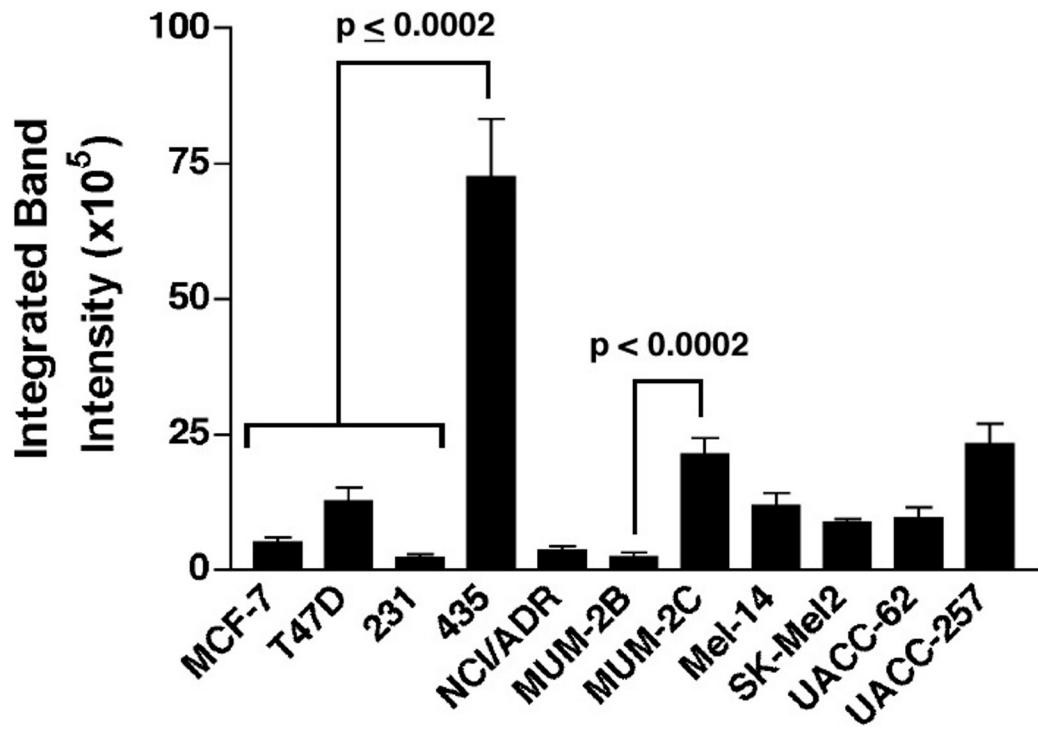



### Urokinase Type Plasminogen Activator (uPA)

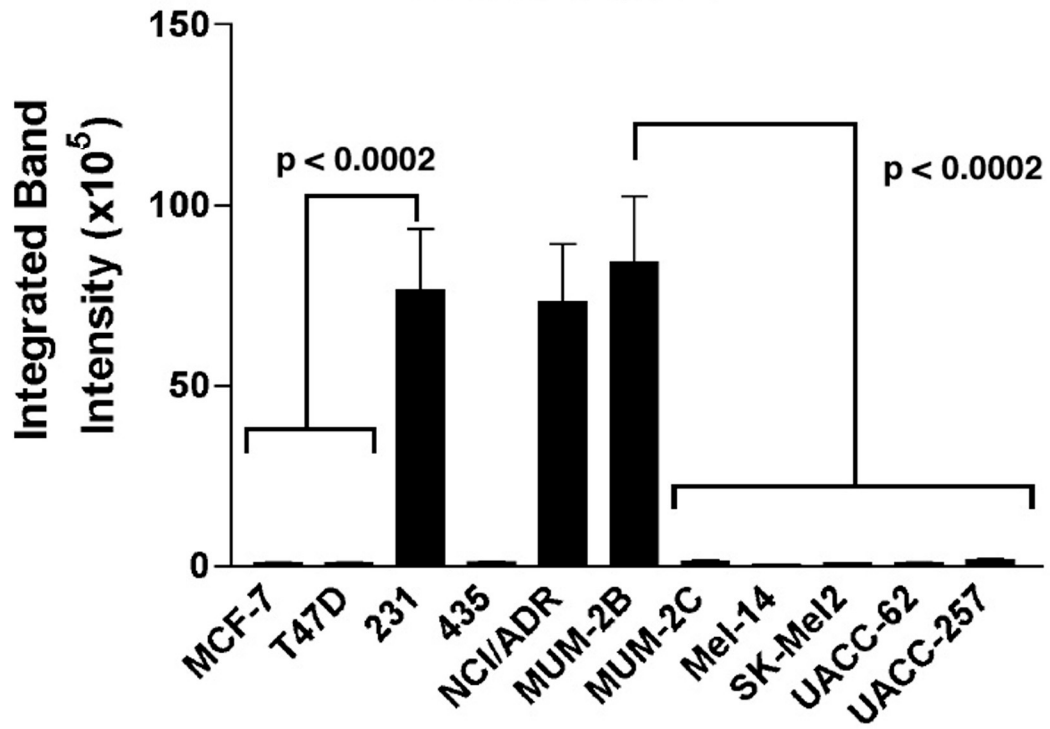

Supplement: pnas_162187599_2.pdf [file pnas_162187599_2.pdf]
